# Supplementary material for: Domain-specific physical activity patterns and cardiorespiratory fitness among the working population: Findings from the cross-sectional German Health Interview and Examination Survey
Source: PubMed Central journal article supplement — BMJ Open. 2020 Apr 27;10(4):e034610. doi: 10.1136/bmjopen-2019-034610 (PMC7213860; doi:10.1136/bmjopen-2019-034610), 2020-04-27
Supplement: bmjopen-2019-034610supp001.pdf [file bmjopen-2019-034610supp001.pdf]

**Online Supplemental Material 1: Supplementary tables**

**Additional file to:** Zeiher J, Duch M, Mensink GBM, Finger JD, Keil T. Domain-specific physical activity patterns and cardiorespiratory fitness among the working population. Findings from the German cross-sectional health interview and examination survey

**Table S1** Top ten occupations (ISCO-88; 4-digit) among men and women according to OPA

| Men             |                                                                    |     |            | Women           |                                                                  |      |             |
|-----------------|--------------------------------------------------------------------|-----|------------|-----------------|------------------------------------------------------------------|------|-------------|
| Rank            | Occupations [ISCO-88]                                              | %   | 95% CI     | Rank            | Occupations [ISCO-88]                                            | %    | 95% CI      |
| <b>High OPA</b> |                                                                    |     |            | <b>High OPA</b> |                                                                  |      |             |
| 1.              | Electronics mechanics and servicers                                | 7,6 | (5,1-11,3) | 1.              | Institution-based personal care workers                          | 16,6 | (12,4-22,0) |
| 2.              | Plumbers and pipe fitters                                          | 5,7 | (3,6-9,0)  | 2.              | Nursing associate professionals                                  | 13,6 | (10,1-18,0) |
| 3.              | Skilled agricultural and fishery workers                           | 4,7 | (2,6-8,3)  | 3.              | Social work associate professionals                              | 5,5  | (3,6-8,2)   |
| 4.              | Agricultural- or industrial-machinery mechanics and fitters        | 4,6 | (2,7-7,6)  | 4.              | Childcare workers                                                | 5,3  | (2,8-9,8)   |
| 5.              | Machine-tool setters and setter-operators                          | 4,1 | (2,4-6,7)  | 5.              | Pre-primary education teaching associate professionals           | 4,8  | (2,9-7,8)   |
| 6.              | Cooks                                                              | 3,7 | (1,5-8,5)  | 6.              | Shop salespersons and demonstrators                              | 4,4  | (2,5-7,7)   |
| 7.              | Structural-metal preparers and erectors                            | 3,6 | (2,0-6,5)  | 7.              | Waiters, waitresses and bartenders                               | 4,3  | (2,2-8,1)   |
| 8.              | Building and related electricians                                  | 3,3 | (1,6-6,5)  | 8.              | Cooks                                                            | 3,6  | (1,8-7,1)   |
| 9.              | Painters, upholsterers and related workers                         | 3,0 | (1,8-5,1)  | 9.              | Hairdressers, barbers, beauticians and related workers           | 3,0  | (1,5-5,8)   |
| 10.             | Cabinet makers and related workers                                 | 2,7 | (1,5-4,7)  | 10.             | Helpers and cleaners in offices, hotels and other establishments | 3,0  | (1,5-5,8)   |
| <b>Low OPA</b>  |                                                                    |     |            | <b>Low OPA</b>  |                                                                  |      |             |
| 1.              | Other office clerks                                                | 4,4 | (2,8-6,9)  | 1.              | Shop salespersons and demonstrators                              | 10,6 | (8,3-13,6)  |
| 2.              | Shop salespersons and demonstrators                                | 3,4 | (2,0-5,7)  | 2.              | Other office clerks                                              | 7,5  | (5,3-10,5)  |
| 3.              | Business professionals not elsewhere classified                    | 3,2 | (1,9-5,3)  | 3.              | Bookkeepers                                                      | 5,7  | (4,1-8,0)   |
| 4.              | Heavy-truck and lorry drivers                                      | 2,7 | (1,4-5,0)  | 4.              | Secondary education teaching professionals                       | 4,8  | (3,4-6,8)   |
| 5.              | Computer assistants                                                | 2,6 | (1,6-4,4)  | 5.              | Secretaries                                                      | 3,9  | (2,4-6,2)   |
| 6.              | Computing professionals not elsewhere classified                   | 2,5 | (1,3-4,7)  | 6.              | Statistical and finance clerks                                   | 3,8  | (2,5-5,6)   |
| 7.              | Technical and commercial sales representatives                     | 2,4 | (1,4-4,1)  | 7.              | Administrative secretaries and related associate professionals   | 3,6  | (2,4-5,3)   |
| 8.              | Finance and sales associate professionals not elsewhere classified | 2,4 | (1,3-4,5)  | 8.              | Legal and related business associate professionals               | 2,7  | (1,5-4,9)   |
| 9.              | Stock clerks                                                       | 2,4 | (1,3-4,6)  | 9.              | Finance and sales associate professionals not elsewhere classif. | 2,4  | (1,5-3,6)   |
| 10.             | Civil engineers                                                    | 2,0 | (1,1-3,7)  | 10.             | Cashiers and ticket clerks                                       | 2,3  | (1,2-4,3)   |

CI Confidence intervals, ISCO-88 International Standard Classification of Occupations, OPA Occupational physical activity
